# Supplementary material
Source: PubMed Central journal article supplement (PMC4883279)
Supplement: 13568_2014_93_MOESM1_ESM.pdf [file 13568_2014_93_MOESM1_ESM.pdf]

**Fungal strain matters: Colony growth and bioactivity of the European medicinal polypores  
*Fomes fomentarius*, *Fomitopsis pinicola* and *Piptoporus betulinus***

AMB Express

Philipp Dresch, Maria Nives D´Aguanno, Katharina Rosam, Ulrike Grienke, Judith Rollinger, Ursula Peintner\*

\*Institute of Microbiology, University of Innsbruck, Technikerstraße 25, 6020 Innsbruck, Austria,  
E-mail: ursula.peintner@uibk.ac.at

**Supplementary Material**

Fig. S1 – HPLC chromatograms of ethanolic polypore fruit body extracts. Analyses were carried out using a Shimadzu UFLC XR device at 40 °C, a flow rate of 1.0 mL min<sup>-1</sup>, injection volume was 10 µL, detection wavelength 254 nm. The stationary phase was a Phenomenex® HyperClone ODS (C18) column, 120 Å, 5µm, 150 x 4.60 mm; mobile phase A: H<sub>2</sub>O + 0.9 % AA + 0.1 % FA; mobile phase B: ACN + 0.9 % AA + 0.1 % FA; 0 min: 90 % A to 30 min: 2 % A, 30-45 min: 2 % A.

***Fomes fomentarius***

Fomfom IB20130011

mAU

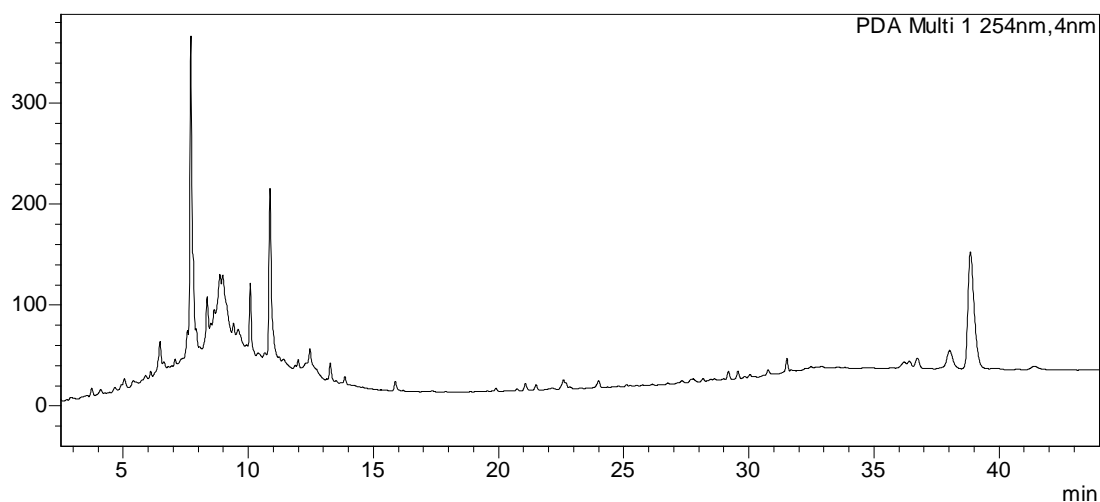

Fomfom IB20130016

mAU

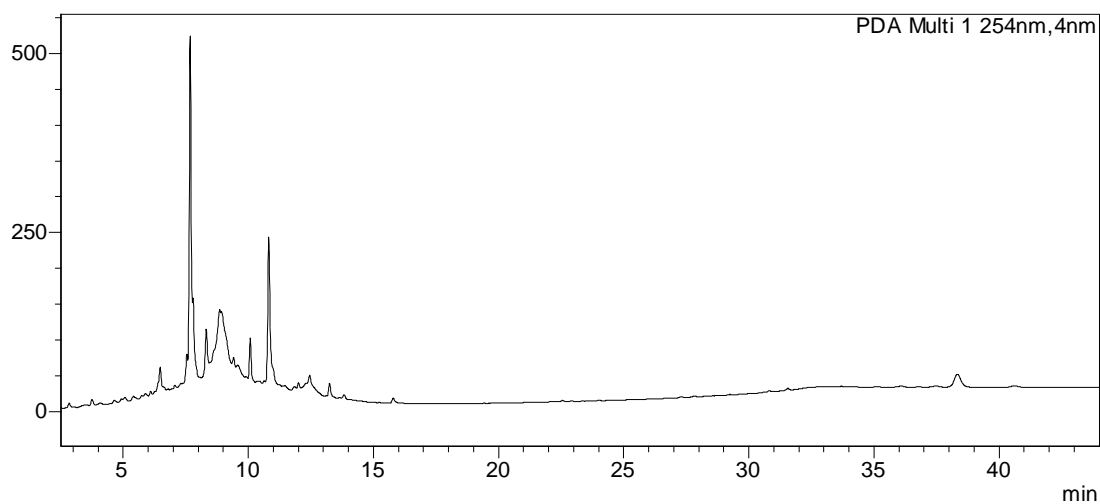

Fomfom IB20130019

mAU

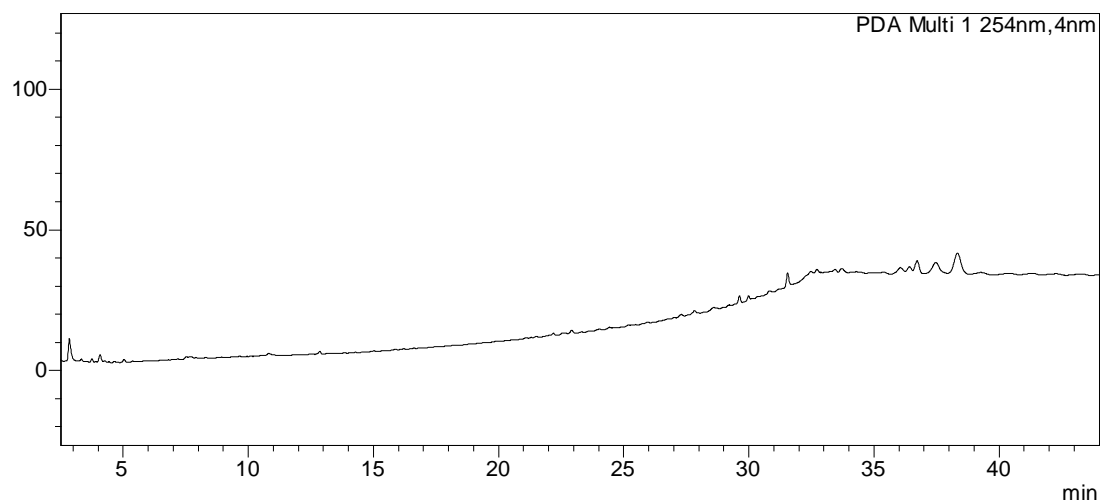

Fomfom IB20130022

mAU

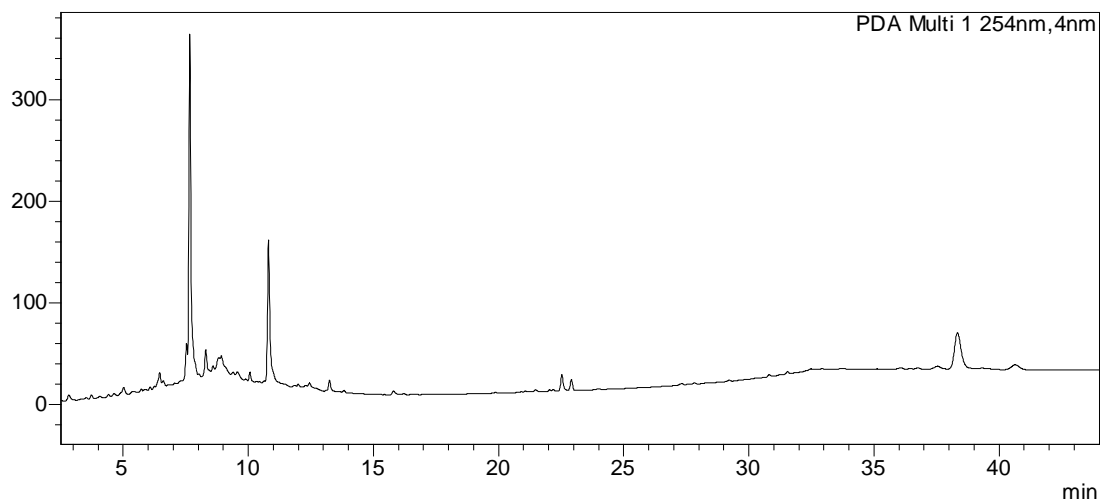

Fomfom IB20130033

mAU

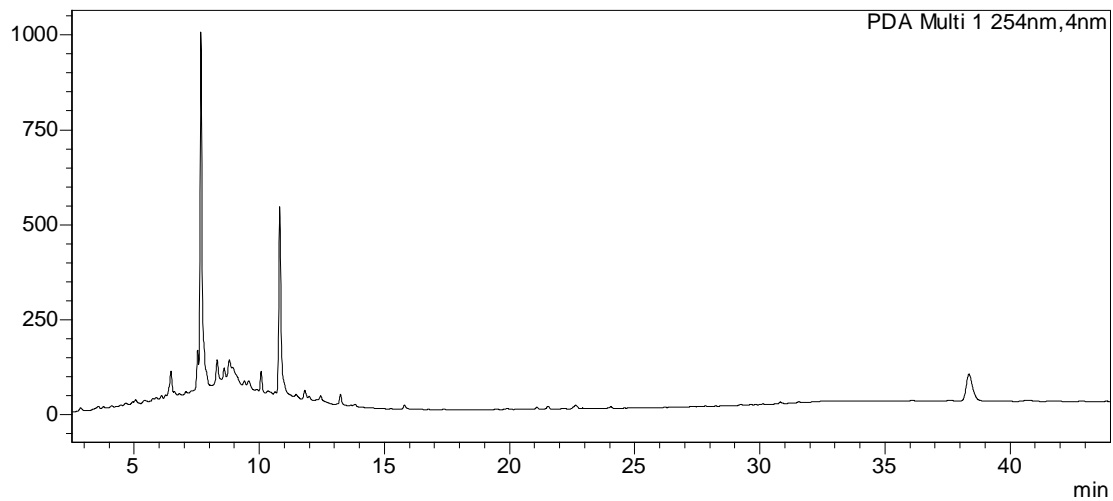

***Fomitopsis pinicola***

Fompin IB20130010

mAU

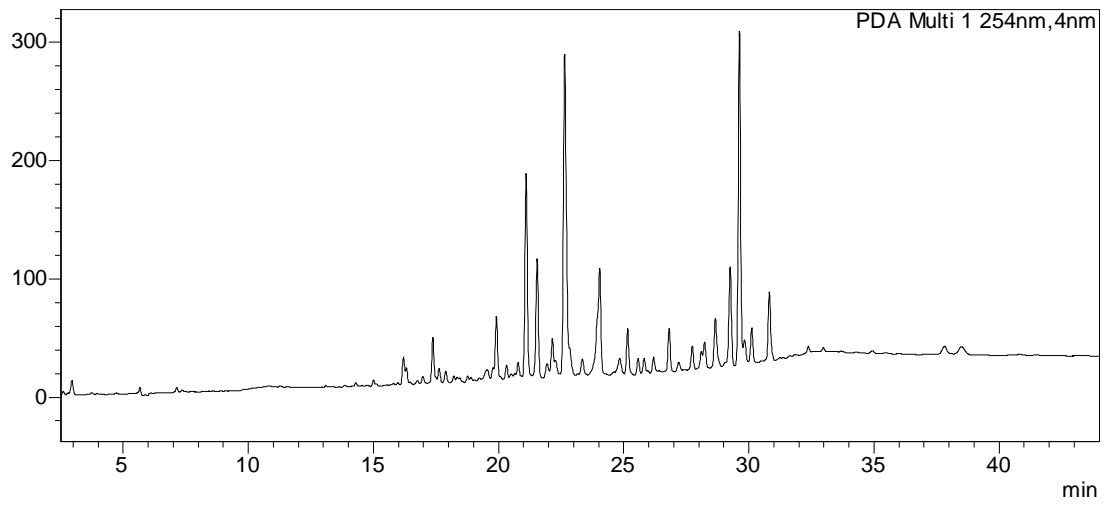

Fompin IB20130013

mAU

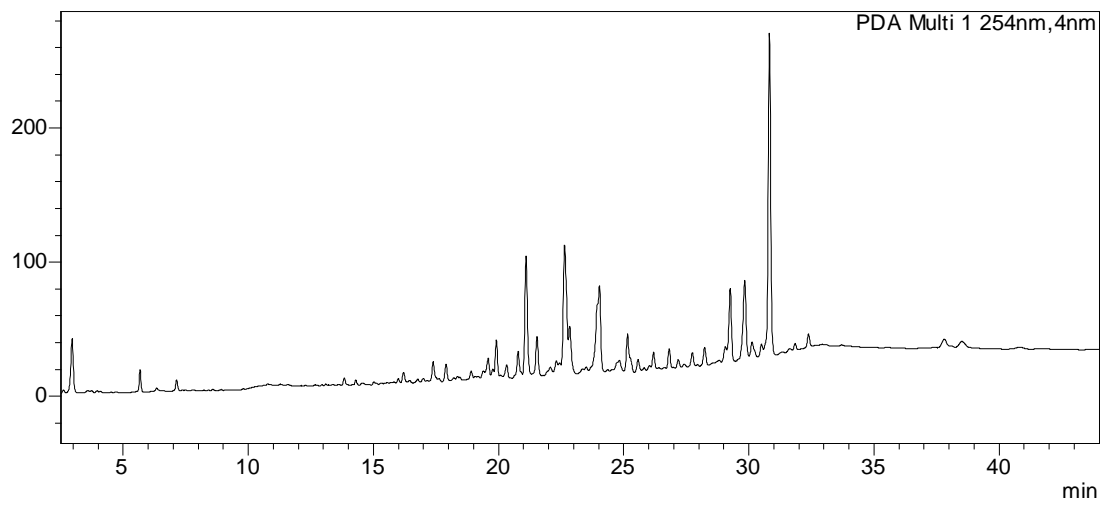

Fompin IB20130015

mAU

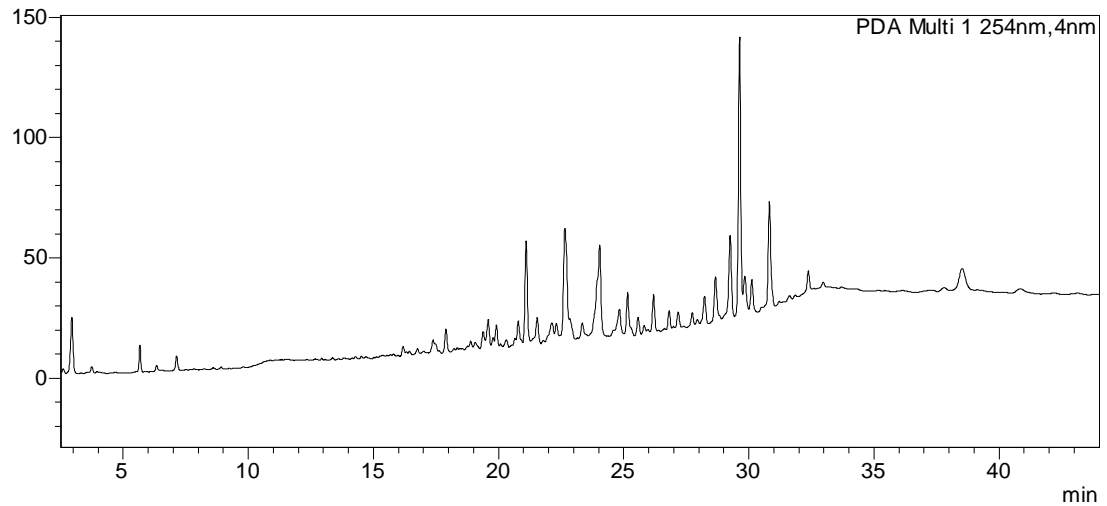

Fompin IB20130018

mAU

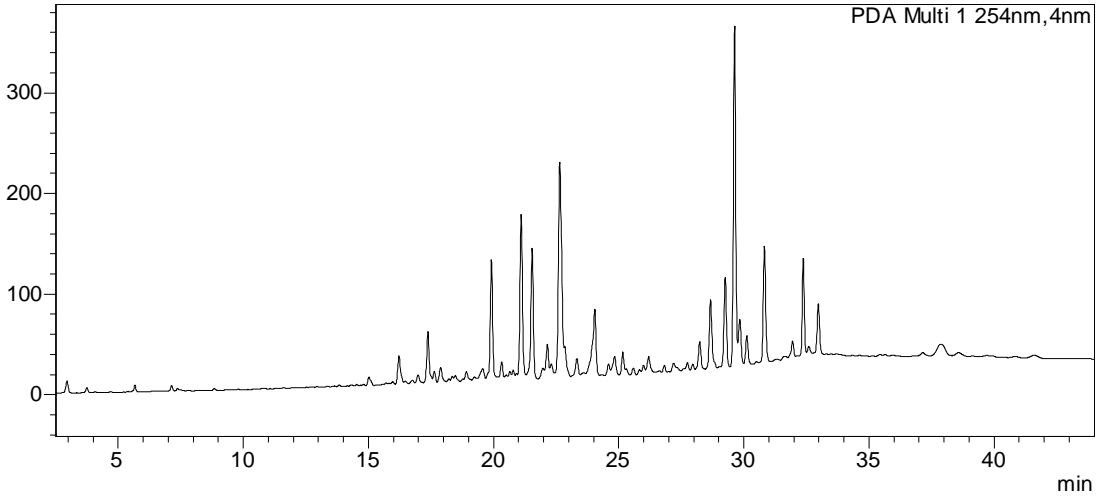

Fompin IB20130021

mAU

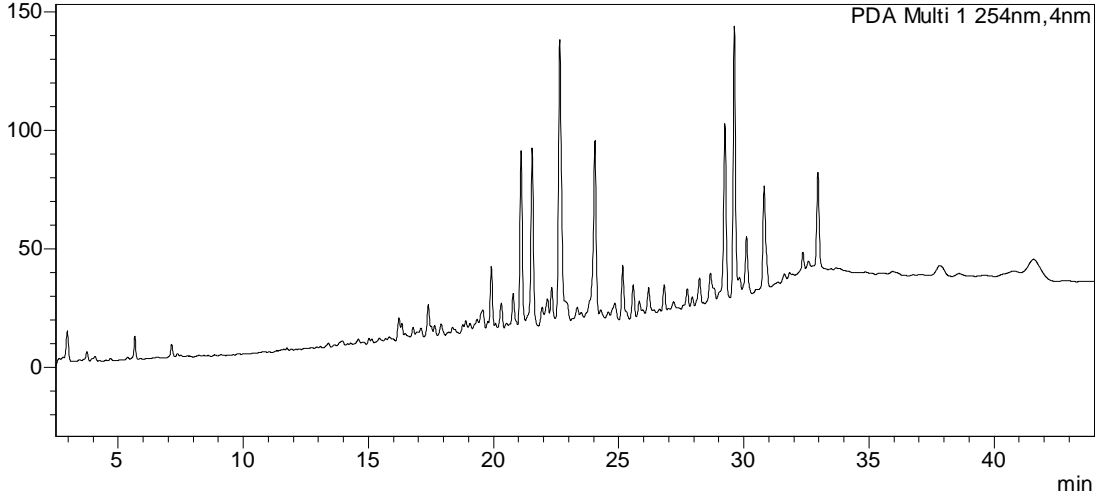

Fompin IB20130024

mAU

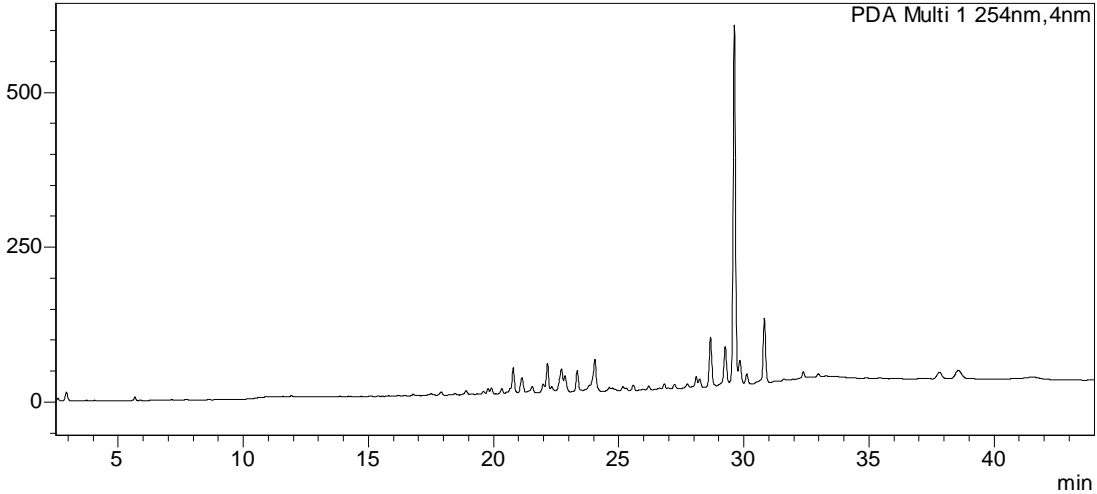

Fompin IB20130026

mAU

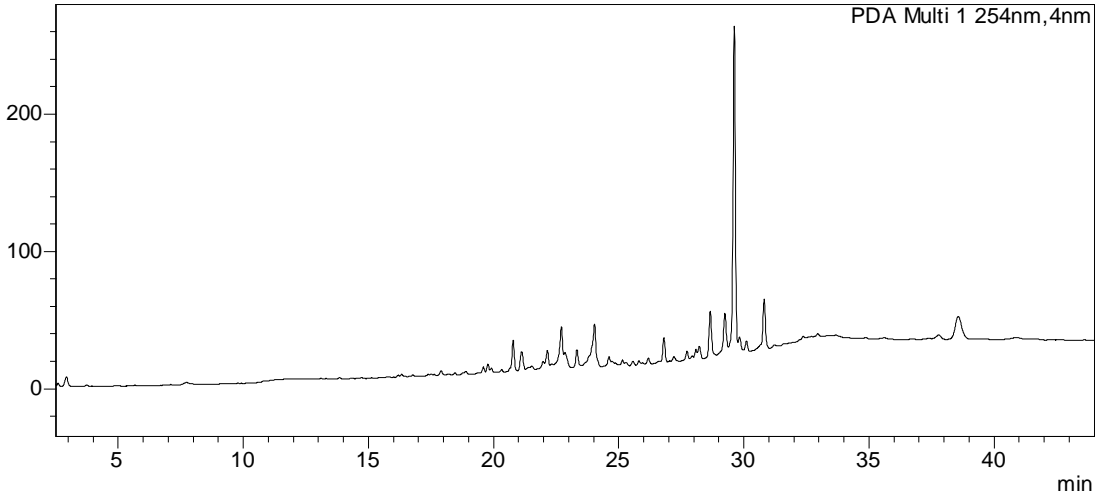

Fompin IB20130030

mAU

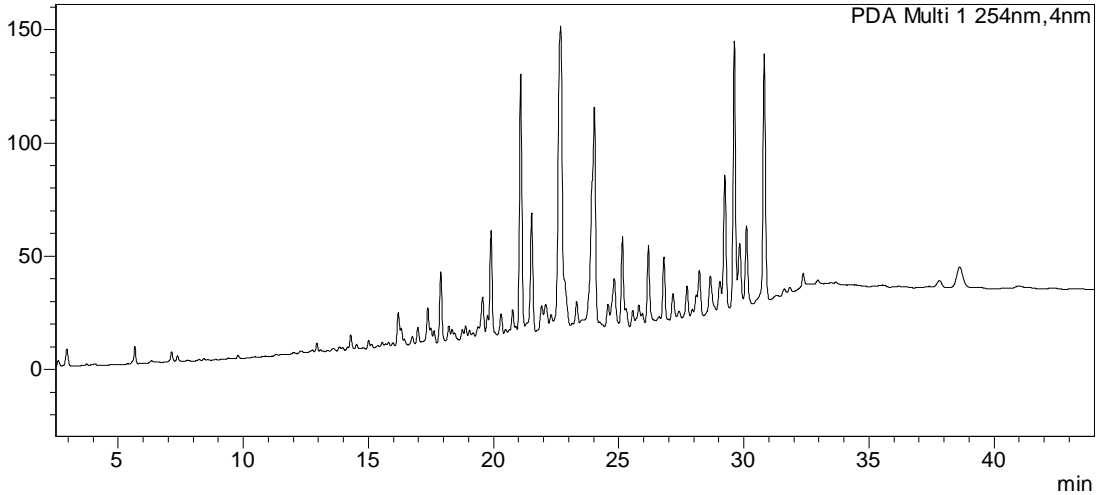

Fompin IB20130037

mAU

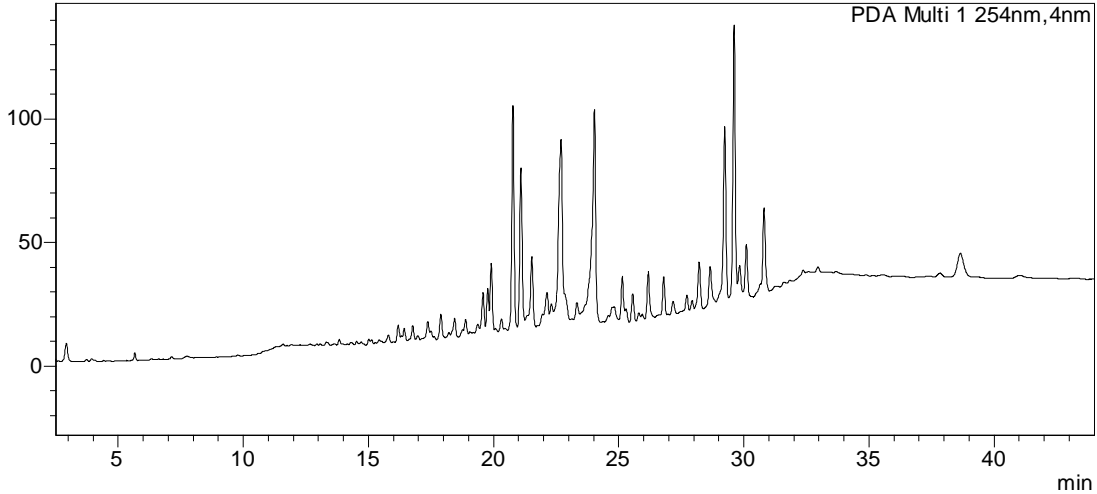

Fompin IB20130040

mAU

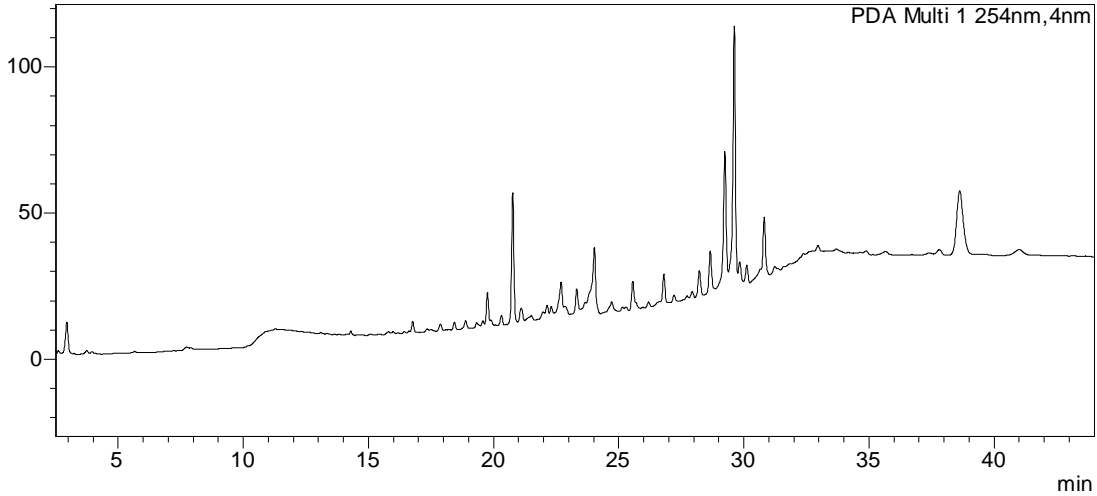

Fompin IB20130053

mAU

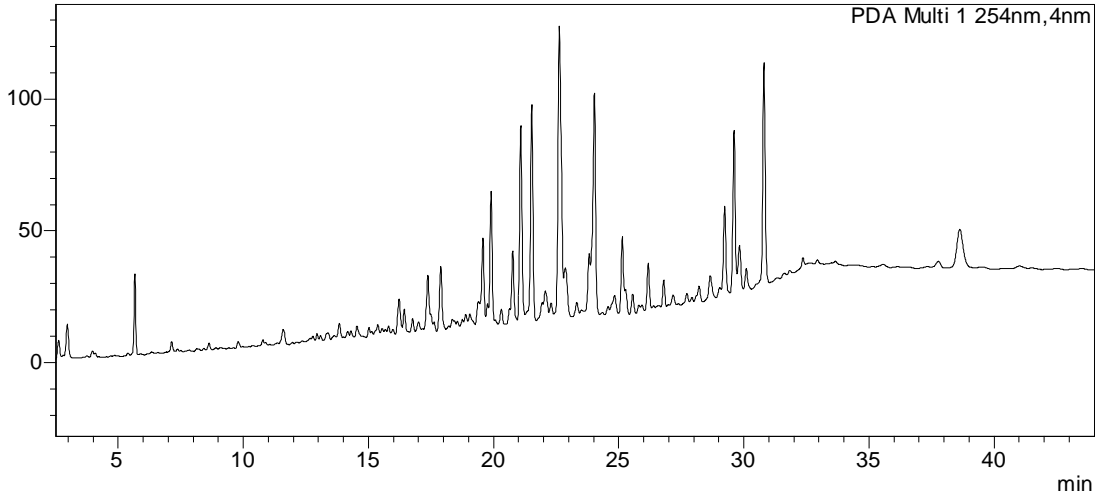

Fompin IB20130034

mAU

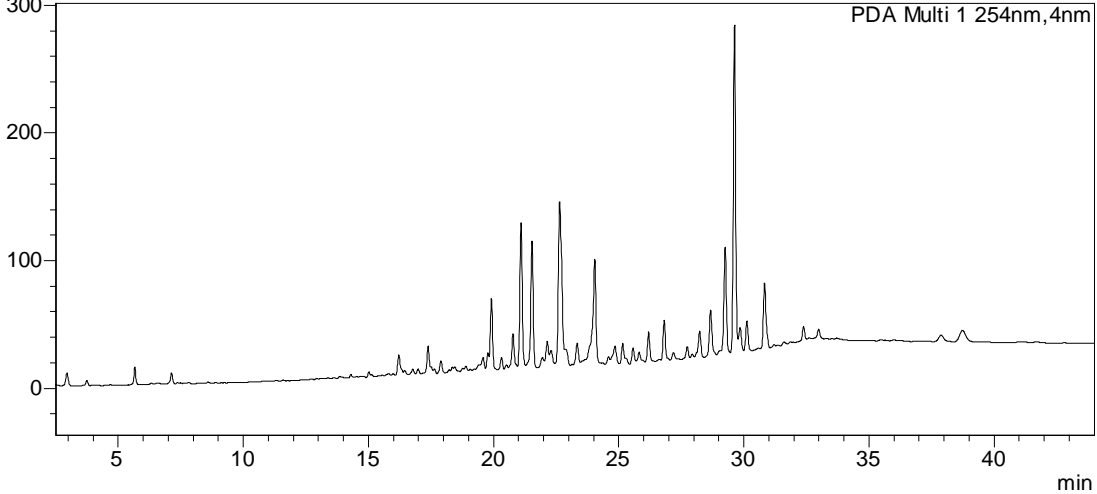

Fompin IB20130042

mAU

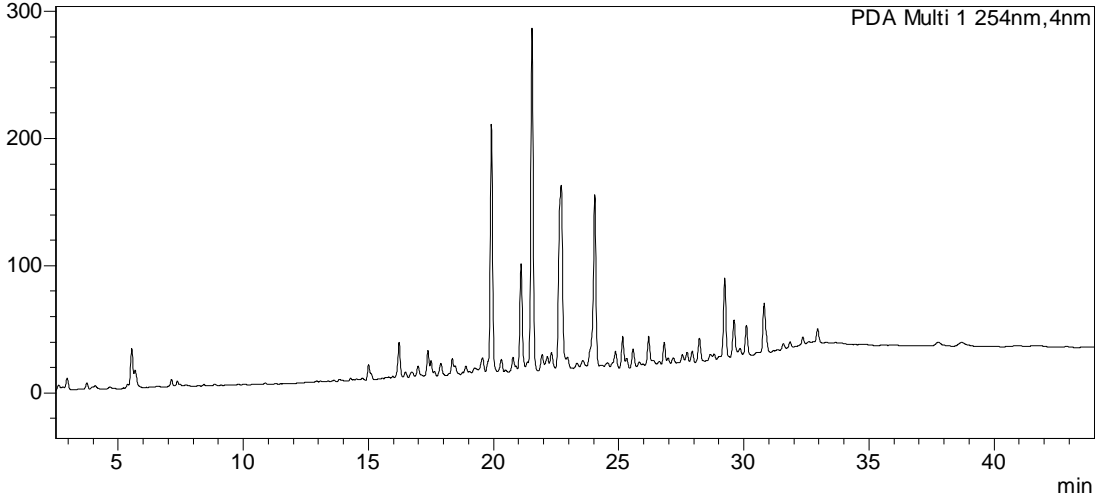

*Piptoporus betulinus*

Pipbet IB20130029

mAU

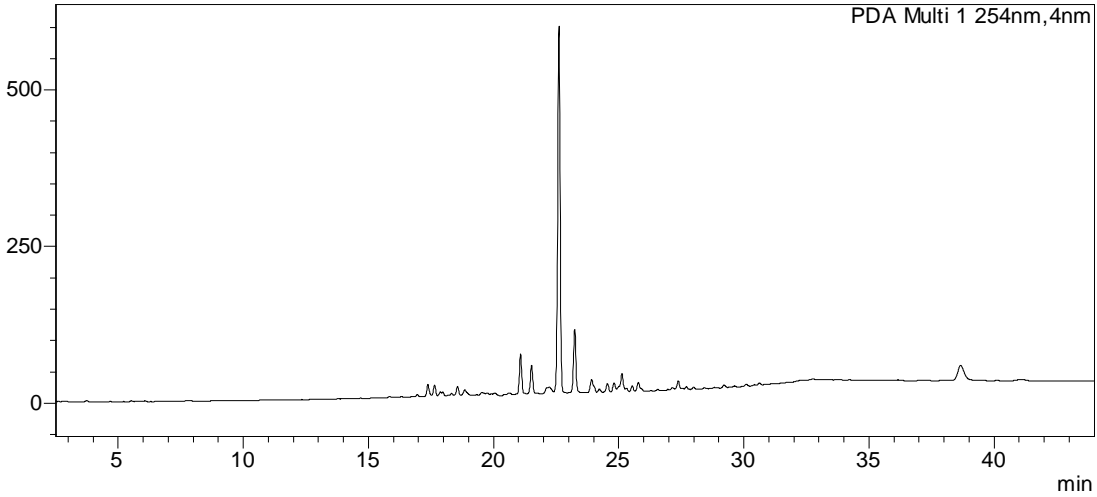

Pipbet IB20130039

mAU

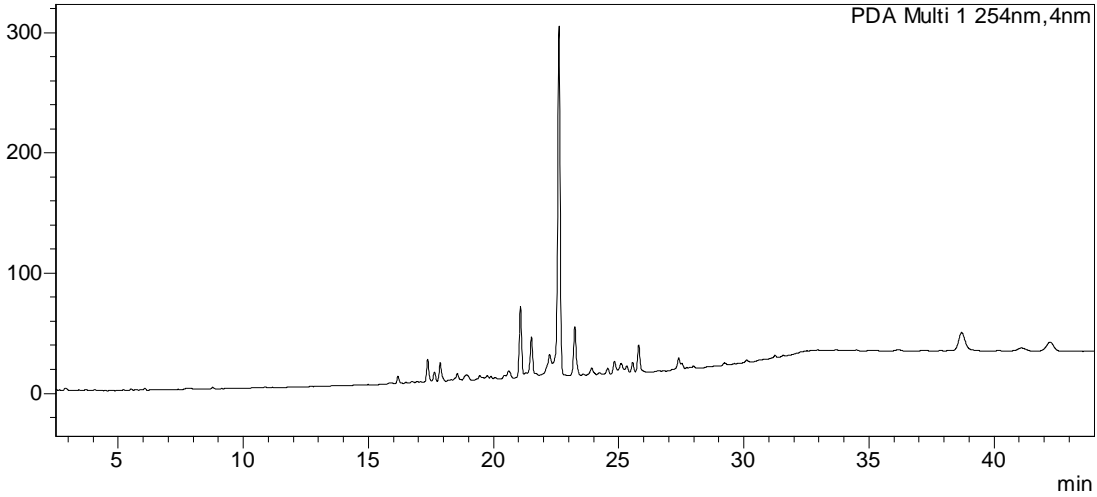



Table S1 - Mean colony diameter and standard deviation of isolated *Fomes fomentarius* strains grown under different temperatures measured over a course of 10 days (n = 3).

| Temperature | strain   | 2 days |      | 5 days |      | 7 days |      | 10 days |      |
|-------------|----------|--------|------|--------|------|--------|------|---------|------|
|             |          | Mean   | SD   | Mean   | SD   | Mean   | SD   | Mean    | SD   |
| 10 °C       | 20130011 | 0.00   | 0.00 | 0.83   | 0.15 | 0.13   | 0.06 | 0.83    | 0.15 |
|             | 20130016 | 0.00   | 0.00 | 0.13   | 0.06 | 0.13   | 0.06 | 0.83    | 0.06 |
|             | 20130019 | 0.00   | 0.00 | 0.13   | 0.06 | 0.07   | 0.06 | 1.23    | 0.31 |
|             | 20130022 | 0.30   | 0.10 | 1.23   | 0.06 | 1.27   | 0.25 | 1.53    | 0.12 |
|             | 20130033 | 0.00   | 0.00 | 0.00   | 0.00 | 0.53   | 0.15 | 0.70    | 0.20 |
| 20 °C       | 20130011 | 0.00   | 0.00 | 2.70   | 0.26 | 2.93   | 0.23 | 4.60    | 3.58 |
|             | 20130016 | 0.00   | 0.00 | 4.67   | 0.29 | 4.83   | 0.32 | 7.10    | 0.10 |
|             | 20130019 | 0.00   | 0.00 | 1.43   | 0.49 | 1.73   | 0.51 | 7.03    | 0.32 |
|             | 20130022 | 1.17   | 0.06 | 3.07   | 0.15 | 4.50   | 0.46 | 6.13    | 0.47 |
|             | 20130033 | 0.00   | 0.00 | 0.47   | 0.06 | 3.23   | 0.15 | 6.17    | 0.21 |
| 25 °C       | 20130011 | 0.13   | 0.02 | 4.13   | 0.80 | 7.13   | 0.80 | 8.80    | 0.26 |
|             | 20130016 | 0.16   | 0.05 | 5.93   | 0.72 | 7.63   | 0.64 | 8.70    | 0.30 |
|             | 20130019 | 0.13   | 0.01 | 2.87   | 0.45 | 5.07   | 0.42 | 7.90    | 0.30 |
|             | 20130022 | 0.14   | 0.01 | 4.77   | 0.61 | 8.13   | 0.21 | 8.90    | 0.17 |
|             | 20130033 | 0.93   | 0.15 | 2.73   | 0.57 | 4.07   | 0.47 | 6.43    | 0.50 |
| 30 °C       | 20130011 | 0.93   | 0.40 | 6.83   | 1.07 | 7.07   | 1.27 | 8.57    | 0.06 |
|             | 20130016 | 1.07   | 0.06 | 7.13   | 0.15 | 7.40   | 0.20 | 8.57    | 0.06 |
|             | 20130019 | 0.43   | 0.12 | 2.17   | 0.06 | 2.43   | 0.06 | 8.60    | 0.00 |
|             | 20130022 | 1.60   | 0.10 | 6.23   | 0.12 | 8.13   | 0.21 | 8.53    | 0.06 |
|             | 20130033 | 0.13   | 0.06 | 3.47   | 0.31 | 5.60   | 2.87 | 8.30    | 0.46 |
| 32 °C       | 20130011 | 0.39   | 0.25 | 5.40   | 1.15 | 5.33   | 0.23 | 6.63    | 0.45 |
|             | 20130016 | 0.28   | 0.18 | 3.90   | 0.61 | 5.13   | 0.25 | 6.73    | 0.25 |
|             | 20130019 | 0.03   | 0.06 | 3.47   | 0.47 | 3.77   | 0.51 | 5.40    | 0.53 |
|             | 20130022 | 0.12   | 0.02 | 4.64   | 0.34 | 4.97   | 0.25 | 7.03    | 0.23 |
|             | 20130033 | 1.31   | 0.12 | 6.23   | 0.49 | 8.67   | 0.49 | 8.97    | 0.06 |
| 37 °C       | 20130011 | 0.00   | 0.00 | 0.00   | 0.00 | 0.00   | 0.00 | 0.00    | 0.00 |
|             | 20130016 | 0.00   | 0.00 | 0.00   | 0.00 | 0.00   | 0.00 | 0.00    | 0.00 |
|             | 20130019 | 0.00   | 0.00 | 0.00   | 0.00 | 0.00   | 0.00 | 0.00    | 0.00 |
|             | 20130022 | 0.17   | 0.12 | 0.23   | 0.06 | 1.07   | 0.15 | 1.53    | 0.06 |
|             | 20130033 | 0.00   | 0.00 | 0.00   | 0.00 | 0.00   | 0.00 | 0.00    | 0.00 |

Table S2 - Mean colony diameter and standard deviation of isolated *Fomitopsis pinicola* strains grown under different temperatures measured over a course of 10 days (n = 3).

| Temperature | strain   | 2 days |      | 5 days |      | 7 days |      | 10 days |      |
|-------------|----------|--------|------|--------|------|--------|------|---------|------|
|             |          | Mean   | SD   | Mean   | SD   | Mean   | SD   | Mean    | SD   |
| 10 °C       | 20130010 | 0.00   | 0.00 | 0.07   | 0.06 | 0.13   | 0.06 | 1.70    | 0.35 |
|             | 20130013 | 0.00   | 0.00 | 0.13   | 0.06 | 0.17   | 0.06 | 1.43    | 0.15 |
|             | 20130015 | 0.00   | 0.00 | 0.17   | 0.06 | 0.23   | 0.06 | 1.67    | 0.31 |
|             | 20130018 | 0.00   | 0.00 | 0.23   | 0.06 | 0.23   | 0.12 | 2.77    | 1.51 |
|             | 20130021 | 0.00   | 0.00 | 0.23   | 0.12 | 0.13   | 0.06 | 1.70    | 0.26 |
|             | 20130026 | 0.60   | 0.10 | 1.10   | 0.10 | 1.07   | 0.21 | 1.47    | 0.15 |
|             | 20130030 | 0.00   | 0.00 | 0.40   | 0.10 | 1.03   | 0.15 | 1.30    | 0.20 |
|             | 20130034 | 0.10   | 0.10 | 0.33   | 0.21 | 0.43   | 0.12 | 1.90    | 0.26 |
|             | 20130040 | 0.13   | 0.06 | 0.43   | 0.06 | 0.20   | 0.17 | 0.40    | 0.69 |
|             | 20130042 | 0.00   | 0.00 | 0.13   | 0.06 | 0.20   | 0.10 | 1.37    | 0.12 |
| 20 °C       | 20130010 | 0.00   | 0.00 | 6.03   | 0.32 | 6.27   | 1.45 | 7.87    | 0.32 |
|             | 20130013 | 0.00   | 0.00 | 6.17   | 0.31 | 6.47   | 0.31 | 7.80    | 0.26 |
|             | 20130015 | 0.00   | 0.00 | 5.83   | 0.15 | 6.03   | 0.15 | 8.03    | 0.06 |
|             | 20130018 | 0.00   | 0.00 | 4.50   | 0.20 | 4.70   | 0.20 | 3.00    | 0.69 |
|             | 20130021 | 0.00   | 0.00 | 4.83   | 0.32 | 5.03   | 0.32 | 7.37    | 0.47 |
|             | 20130026 | 1.20   | 0.10 | 3.50   | 0.10 | 5.27   | 0.25 | 6.83    | 0.15 |
|             | 20130030 | 0.13   | 0.06 | 1.83   | 0.25 | 2.27   | 0.49 | 2.73    | 0.38 |
|             | 20130034 | 0.13   | 0.06 | 1.77   | 0.15 | 5.00   | 0.26 | 7.10    | 0.26 |
|             | 20130040 | 0.23   | 0.06 | 1.70   | 0.17 | 0.90   | 0.10 | 1.27    | 0.15 |
|             | 20130042 | 0.00   | 0.00 | 1.00   | 0.10 | 5.90   | 0.10 | 7.93    | 0.15 |
| 25 °C       | 20130010 | 0.42   | 0.20 | 6.77   | 0.21 | 7.70   | 1.04 | 8.93    | 0.06 |
|             | 20130013 | 0.37   | 0.31 | 6.47   | 0.31 | 7.30   | 0.70 | 8.20    | 0.62 |
|             | 20130015 | 0.20   | 0.10 | 6.13   | 0.15 | 8.53   | 0.91 | 8.80    | 0.35 |
|             | 20130018 | 0.13   | 0.15 | 6.17   | 0.20 | 7.10   | 0.53 | 8.27    | 0.55 |
|             | 20130021 | 0.03   | 0.06 | 6.97   | 0.32 | 7.13   | 0.80 | 8.37    | 0.60 |
|             | 20130026 | 0.13   | 0.15 | 5.03   | 0.10 | 5.37   | 0.15 | 6.03    | 0.45 |
|             | 20130030 | 1.44   | 0.34 | 4.13   | 0.25 | 4.83   | 0.21 | 6.00    | 1.01 |
|             | 20130034 | 2.02   | 0.48 | 4.80   | 0.15 | 6.67   | 0.87 | 7.43    | 0.55 |
|             | 20130040 | 2.94   | 0.75 | 7.63   | 0.17 | 8.17   | 0.23 | 8.57    | 0.45 |
|             | 20130042 | 0.67   | 0.35 | 6.90   | 0.10 | 7.63   | 1.19 | 8.97    | 0.06 |
| 30 °C       | 20130010 | 1.17   | 0.44 | 6.57   | 0.21 | 6.77   | 0.21 | 8.57    | 0.06 |
|             | 20130013 | 1.13   | 0.15 | 6.57   | 0.40 | 6.67   | 0.58 | 8.47    | 0.06 |
|             | 20130015 | 1.10   | 0.10 | 5.23   | 0.21 | 5.43   | 0.21 | 8.57    | 0.06 |
|             | 20130018 | 1.47   | 0.15 | 6.93   | 0.12 | 7.13   | 0.12 | 8.60    | 0.00 |
|             | 20130021 | 1.50   | 0.00 | 6.97   | 0.15 | 7.17   | 0.15 | 8.53    | 0.06 |
|             | 20130026 | 1.57   | 0.15 | 5.03   | 0.21 | 6.77   | 0.15 | 7.80    | 0.10 |
|             | 20130030 | 1.00   | 0.20 | 2.40   | 0.40 | 8.07   | 0.21 | 8.30    | 0.46 |
|             | 20130034 | 1.17   | 0.31 | 2.80   | 0.66 | 2.00   | 0.10 | 8.90    | 0.00 |
|             | 20130040 | 0.20   | 0.10 | 1.27   | 0.25 | 6.60   | 0.40 | 2.43    | 4.21 |
|             | 20130042 | 1.13   | 0.15 | 1.03   | 0.06 | 6.90   | 0.10 | 8.57    | 0.06 |

Continuation Table S2

|              |          |      |      |      |      |      |      |      |      |
|--------------|----------|------|------|------|------|------|------|------|------|
| <b>32 °C</b> | 20130010 | 0.45 | 0.45 | 4.40 | 0.53 | 5.53 | 0.58 | 6.43 | 0.10 |
|              | 20130013 | 1.65 | 0.44 | 3.93 | 0.06 | 4.87 | 0.32 | 5.57 | 0.46 |
|              | 20130015 | 2.10 | 0.69 | 4.53 | 1.10 | 5.07 | 0.96 | 5.83 | 0.81 |
|              | 20130018 | 3.04 | 0.61 | 4.60 | 0.61 | 5.43 | 1.08 | 6.63 | 0.38 |
|              | 20130021 | 0.00 | 0.00 | 3.83 | 1.21 | 6.47 | 0.49 | 6.83 | 0.67 |
|              | 20130026 | 2.75 | 0.52 | 6.87 | 0.15 | 8.43 | 0.49 | 8.97 | 0.58 |
|              | 20130030 | 3.21 | 0.10 | 7.00 | 0.10 | 8.57 | 0.67 | 8.90 | 0.32 |
|              | 20130034 | 0.50 | 0.30 | 1.03 | 0.15 | 1.73 | 0.29 | 5.40 | 0.96 |
|              | 20130040 | 2.18 | 0.34 | 4.87 | 0.32 | 5.93 | 0.86 | 6.63 | 1.08 |
|              | 20130042 | 1.22 | 0.23 | 4.67 | 0.59 | 5.17 | 0.91 | 6.17 | 0.49 |
| <b>37 °C</b> | 20130010 | 0.00 | 0.00 | 0.00 | 0.00 | 0.00 | 0.00 | 0.00 | 0.00 |
|              | 20130013 | 0.00 | 0.00 | 0.00 | 0.00 | 0.00 | 0.00 | 0.00 | 0.00 |
|              | 20130015 | 0.00 | 0.00 | 0.00 | 0.00 | 0.00 | 0.00 | 0.00 | 0.00 |
|              | 20130018 | 0.00 | 0.00 | 0.00 | 0.00 | 0.00 | 0.00 | 0.00 | 0.00 |
|              | 20130021 | 0.00 | 0.00 | 0.00 | 0.00 | 0.00 | 0.00 | 0.00 | 0.00 |
|              | 20130026 | 0.97 | 0.21 | 0.20 | 0.10 | 1.27 | 0.12 | 1.47 | 0.12 |
|              | 20130030 | 0.00 | 0.00 | 0.13 | 0.15 | 0.00 | 0.00 | 0.00 | 0.00 |
|              | 20130034 | 0.07 | 0.06 | 0.23 | 0.06 | 0.00 | 0.00 | 0.00 | 0.00 |
|              | 20130040 | 0.00 | 0.00 | 0.00 | 0.00 | 0.00 | 0.00 | 0.10 | 0.17 |
|              | 20130042 | 0.00 | 0.00 | 0.10 | 0.17 | 0.00 | 0.00 | 0.00 | 0.00 |

Table S3 - Mean colony diameter and standard deviation of isolated *Piptoporus betulinus* strains grown under different temperatures measured over a course of 10 days (n = 3).

| Temperature | strain   | 2 days |      | 5 days |      | 7 days |      | 10 days |      |
|-------------|----------|--------|------|--------|------|--------|------|---------|------|
|             |          | Mean   | SD   | Mean   | SD   | Mean   | SD   | Mean    | SD   |
| 10 °C       | 20130029 | 0.03   | 0.06 | 0.30   | 0.10 | 1.73   | 0.15 | 1.90    | 0.26 |
|             | 20130039 | 0.17   | 0.06 | 0.23   | 0.06 | 0.10   | 0.10 | 1.73    | 0.15 |
|             | 20130055 | 0.30   | 0.10 | 0.47   | 0.15 | 1.57   | 0.06 | 0.70    | 0.20 |
| 20 °C       | 20130029 | 1.03   | 0.15 | 2.97   | 0.15 | 5.27   | 0.15 | 7.33    | 0.21 |
|             | 20130039 | 0.93   | 0.15 | 2.20   | 0.26 | 3.70   | 0.53 | 6.20    | 0.56 |
|             | 20130055 | 0.47   | 0.15 | 1.67   | 0.61 | 3.67   | 1.01 | 6.30    | 1.04 |
| 25 °C       | 20130029 | 1.83   | 0.42 | 4.70   | 0.15 | 7.67   | 0.15 | 8.10    | 0.85 |
|             | 20130039 | 1.02   | 0.11 | 5.67   | 0.26 | 7.30   | 0.53 | 8.07    | 0.90 |
|             | 20130055 | 1.54   | 0.40 | 5.60   | 0.61 | 7.07   | 1.01 | 8.97    | 0.06 |
| 30 °C       | 20130029 | 0.87   | 0.25 | 2.70   | 0.44 | 5.37   | 0.40 | 8.33    | 0.21 |
|             | 20130039 | 1.03   | 0.31 | 2.07   | 0.15 | 4.33   | 0.84 | 6.33    | 0.56 |
|             | 20130055 | 0.33   | 0.06 | 1.63   | 0.32 | 5.17   | 0.46 | 7.83    | 1.04 |
| 32 °C       | 20130029 | 0.83   | 0.06 | 1.53   | 0.44 | 4.90   | 0.62 | 7.37    | 0.21 |
|             | 20130039 | 0.59   | 0.09 | 2.23   | 0.15 | 3.90   | 2.27 | 6.77    | 0.56 |
|             | 20130055 | 0.28   | 0.07 | 1.90   | 0.32 | 4.77   | 1.58 | 8.40    | 1.04 |
| 37 °C       | 20130029 | 0.00   | 0.00 | 0.00   | 0.00 | 0.00   | 0.00 | 0.00    | 0.00 |
|             | 20130039 | 0.00   | 0.00 | 0.13   | 0.06 | 0.00   | 0.00 | 0.00    | 0.00 |
|             | 20130055 | 0.07   | 0.06 | 0.07   | 0.06 | 0.13   | 0.06 | 0.13    | 0.06 |
